# Supplementary material for: Extreme Telomere Length Dimorphism in the Tasmanian Devil and Related Marsupials Suggests Parental Control of Telomere Length
Source: PubMed Central journal article supplement (PMC3458001; doi:10.1371/journal.pone.0046195), 2012-09-25

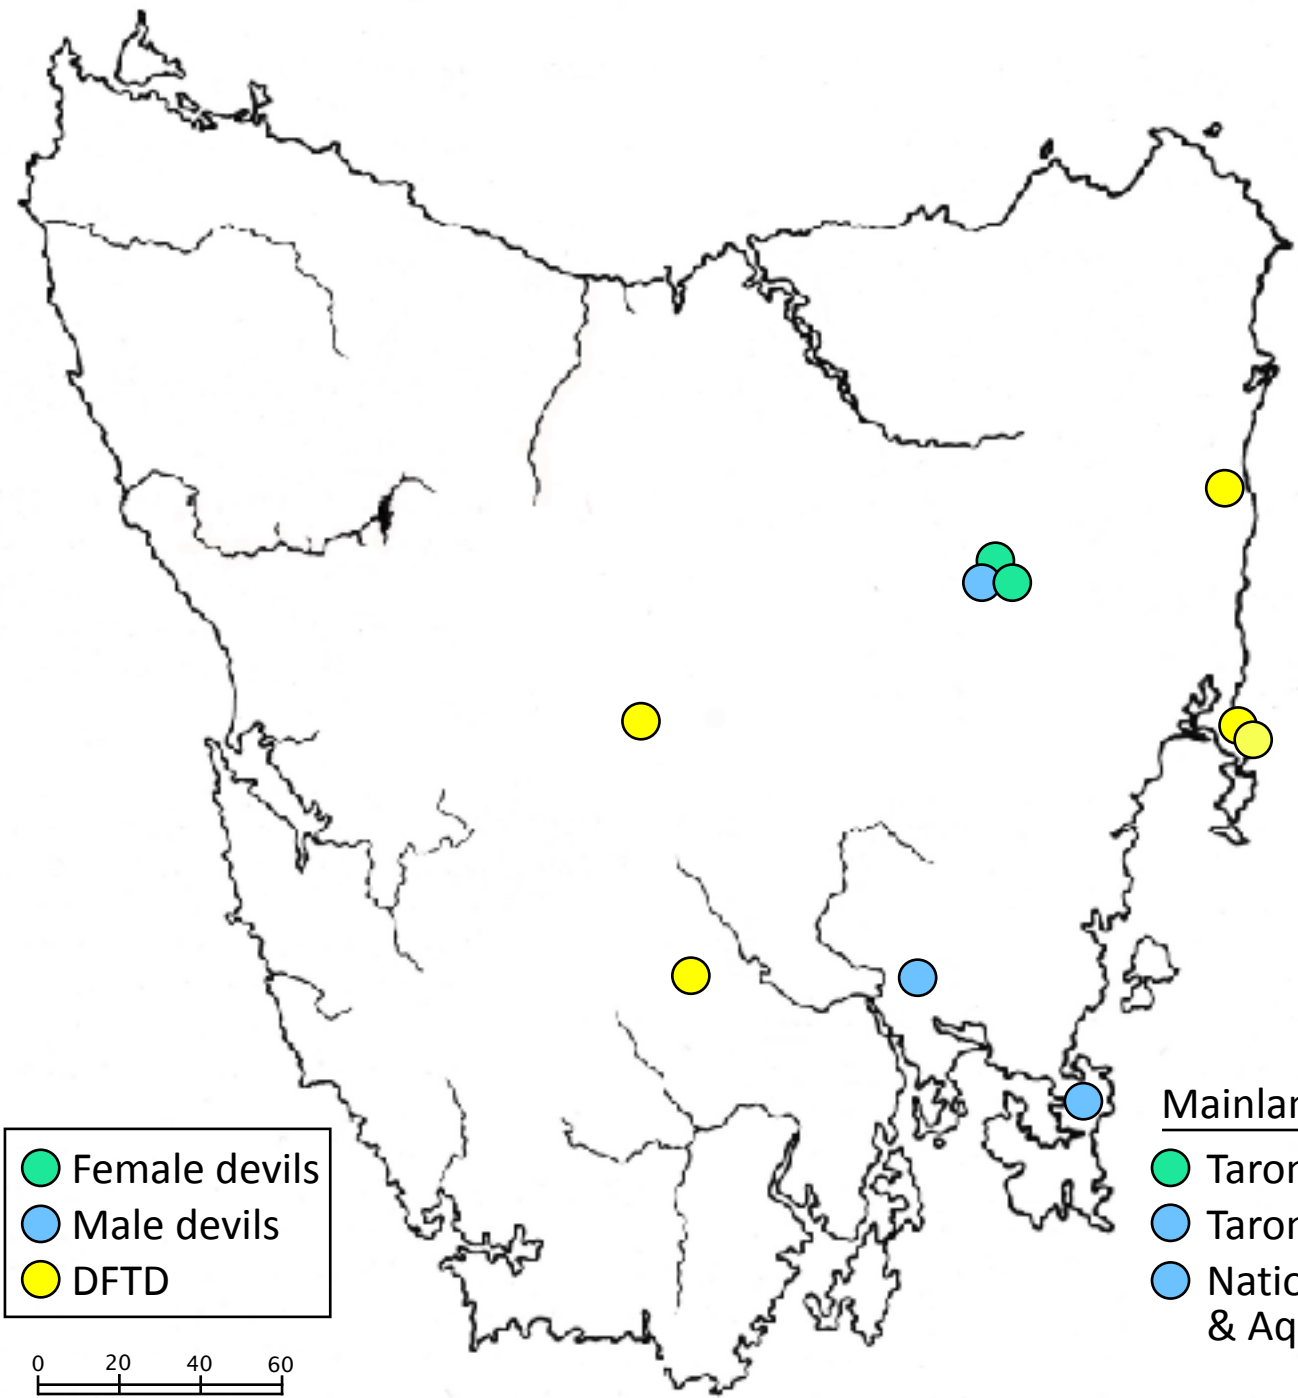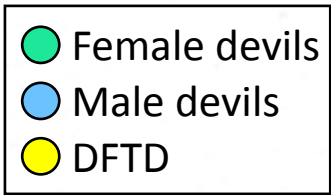

Mainland zoos:

- Green circle: Taronga Zoo
- Blue circle: Taronga Zoo
- Blue circle: National Zoo & Aquarium

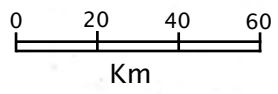

Supplement: pone.0046195.s002.pdf [file pone.0046195.s002.pdf]
